# Supplementary material for: Prokaryotic Communities at Different Depths between Soils with and without Tomato Bacterial Wilt but Pathogen-Present in a Single Greenhouse
Source: PubMed Central journal article supplement (PMC5478534; doi:10.1264/jsme2.me16136), 2017-05-13
Supplement: 32_118_s1.pdf [file 32_118_s1.pdf]

1

| Sample number | Soil layer | DNA concentration ( $\mu\text{g g}^{-1}$ dry soil) | Read number | Observed |       |      |         |         | Soil type |
|---------------|------------|----------------------------------------------------|-------------|----------|-------|------|---------|---------|-----------|
|               |            |                                                    |             | OTUs     | Chao1 | ACE  | Shannon | Simpson |           |
| N1            | Upper      | 145                                                | 11394       | 2103     | 4129  | 4530 | 4.47    | 0.975   | D-soil    |
|               | Lower      | 24                                                 | 12240       | 1778     | 3402  | 3414 | 4.25    | 0.973   |           |
| N2            | Upper      | 67                                                 | 9548        | 1619     | 3088  | 3345 | 4.23    | 0.970   |           |
|               | Lower      | 22                                                 | 8979        | 1416     | 3050  | 3232 | 4.05    | 0.968   |           |
| N3            | Upper      | 92                                                 | 10051       | 2178     | 4713  | 5050 | 4.52    | 0.975   | ND-soil   |
|               | Lower      | 29                                                 | 10465       | 1805     | 3742  | 4108 | 4.06    | 0.965   |           |
| N4            | Upper      | 157                                                | 9532        | 1769     | 3640  | 3755 | 4.42    | 0.974   |           |
|               | Lower      | 20                                                 | 8930        | 1516     | 3452  | 3744 | 4.01    | 0.969   |           |
| N5            | Upper      | 185                                                | 3105        | 995      | 2130  | 2171 | 4.53    | 0.978   | ND-soil   |
|               | Lower      | 41                                                 | 3475        | 952      | 2107  | 2275 | 4.13    | 0.971   |           |
| S2            | Upper      | 29                                                 | 8837        | 1130     | 1954  | 2039 | 4.37    | 0.978   |           |
|               | Lower      | 10                                                 | 9411        | 1238     | 2676  | 2895 | 3.84    | 0.955   |           |

2

Supplemental Table S1. Prokaryotic diversity and richness in each soil sample

3

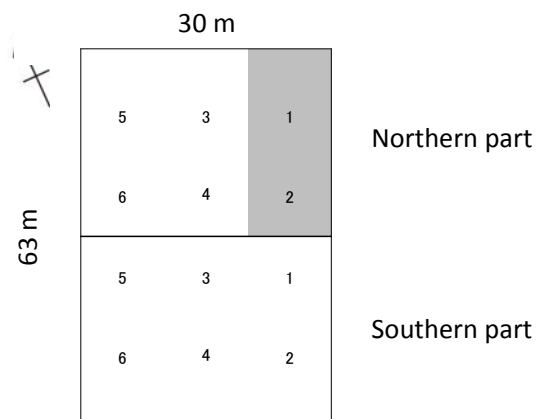

4  
5  
6  
7  
8  
9  
10

Supplemental Figure S1. Sample collection plots in the greenhouse

The sites with tomatoes showing signs of bacterial wilt are indicated in gray shading. Tomato plants were cultivated for 3 and 26 years in the northern and southern parts of the greenhouse, respectively. The greenhouse had been a paddy field before cultivation of tomato plants began. Soil solarization was treated before every planting.

11  
12  
13

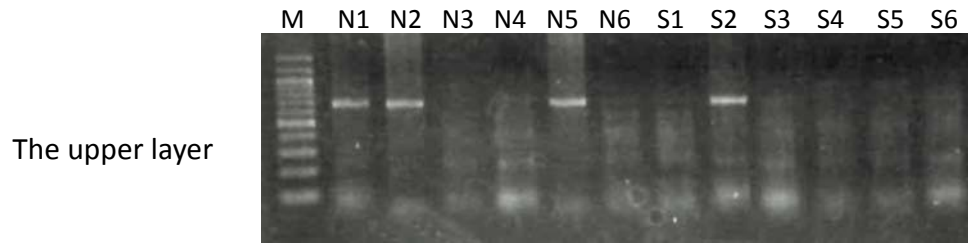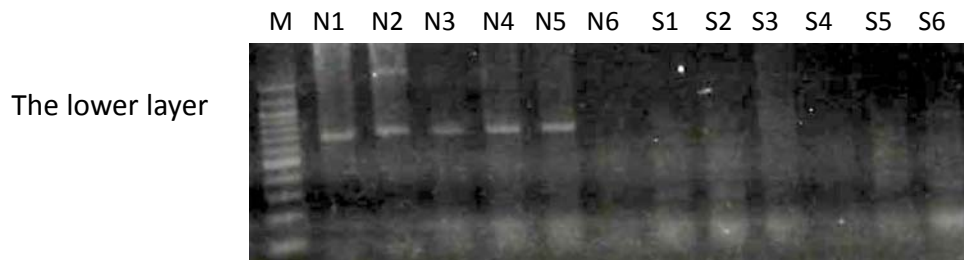

14  
15  
16  
17

Supplemental Figure S2. PCR products of *phcA* in DNA extracted from each soil

M: 100-kb DNA ladder marker (Invitrogen, California, USA); N 1-6 and S 1-6 are the numbers of samples collected in the northern and southern parts of the field, respectively.
